# Supplementary material for: An AIE-active tetra-aryl imidazole-derived chemodosimeter for turn-on recognition of hydrazine and its bioimaging in living cells
Source: Royal Society of Chemistry journal article supplement (doi:10.1039/d4ob01009d), 2024-01-01
Supplement: d4ob01009d1.pdf [file d4ob01009d1.pdf]

## Supporting Information

# **An AIE-active tetra-aryl imidazole-derived chemodosimeter for turn-on recognition of hydrazine and its bioimaging in living cells**

Qing-Xiu Li, Yan-Ju Yuan, Rui-Xing Cheng, Yu Ma, Rui Tan\*, Ya-Wen Wang\*, and  
Yu Peng

School of Chemistry, School of Life Science and Engineering, Southwest Jiaotong  
University, Chengdu 610031, People's Republic of China

tanruiswjt@sohu.com, ywwang@swjtu.edu.cn

## **Table of Contents**

|    |                                                                                        |    |
|----|----------------------------------------------------------------------------------------|----|
| 1. | General methods.....                                                                   | 2  |
| 2. | Summary of AIE-based fluorescent probes for hydrazine. ....                            | 4  |
| 3. | Synthesis of the M-CHO and <b>SWJT-31</b> . ....                                       | 7  |
| 4. | <sup>1</sup> H, <sup>13</sup> C NMR spectra and LC-MS of <b>SWJT-31</b> .....          | 8  |
| 5. | Basic properties of <b>SWJT-31</b> .....                                               | 10 |
| 6. | Application of <b>SWJT-31</b> as test strips .....                                     | 17 |
| 7. | <sup>1</sup> H, <sup>13</sup> C NMR spectra and LC-MS of the product <b>SWJT-N2</b> .. | 18 |
| 8. | Cytotoxicity of <b>SWJT-31</b> in living HeLa cells.....                               | 20 |

## 1. General methods

Aniline, terephthalaldehyde, acetic acid, p-Anisil, ammonium acetate, malonitrile, ethanol, deionized water,  $\text{N}_2\text{H}_4$ , Cys,  $\text{ClO}^-$  and other analytical reagents were all purchased from Innochem Technology Co., Ltd.

$^1\text{H}$  and  $^{13}\text{C}$  NMR spectra were measured with a Bruker AVB-600 spectrometer and Bruker AVB-600 spectrometer, TMS was used as the internal reference, and LC-MS spectra were measured with a Waters2695 spectrometer. Fluorescence spectra were recorded by an F7000 spectrofluorimeter from Hitachi PharmaSpec. Fluorescence imaging of  $\text{N}_2\text{H}_4$  in HeLa cells was recorded on a Nikon A1R<sup>+</sup> (Japan) laser scanning confocal microscope.

**SWJT-31** was dissolved in DMSO to prepare 1.0 mM stock solution,  $\text{N}_2\text{H}_4$  and other other analytical such as: triethylamine, aniline, n-butylamine,  $\text{NH}_4^+$ ,  $\text{Na}^+$ ,  $\text{K}^+$ ,  $\text{Mg}^{2+}$ ,  $\text{Zn}^{2+}$ , Cys, Hcy, GSH,  $\text{ClO}^-$ ,  $\text{HCO}_3^-$ ,  $\text{NO}_2^-$ ,  $\text{SO}_4^{2-}$ ,  $\text{Br}^-$ ,  $\text{S}^{2-}$ , urea,  $\text{H}_2\text{O}_2$ ,  $\text{ONOO}^-$ , Ser, Trp, Leu, Glu were dissolved in distilled water to prepare 10.0 mM stock solution. Ultraviolet-visible absorption and fluorescence spectra were recorded after 20.0  $\mu\text{L}$  of **SWJT-31** stock solution and 20.0  $\mu\text{L}$  of  $\text{N}_2\text{H}_4$  stock solution were diluted to 2.0 mL with DMSO/HEPES (6: 4, v/v, pH = 7.4) buffer solution and incubated at 37°C for 30 min. The selectivity for the  $\text{N}_2\text{H}_4$  is investigated by adding other analytical reagents solutions instead of  $\text{N}_2\text{H}_4$  in a similar way. For fluorescence spectra of AIE effect test, the excitation was set at 420 nm, and the excitation and emission gaps were 10/5 nm. However, fluorescence spectra for detecting hydrazine hydrate, the excitation was set at 340 nm, and the excitation and emission gaps were 5/2.5 nm.

HeLa cells (human cervical cancer cells) were plated in 96-well plates and incubated in a 5% carbon dioxide, 37°C incubators for 24h. After removing the medium, add probes of different concentrations (0, 5.0  $\mu\text{M}$ , 10.0  $\mu\text{M}$ , 15.0  $\mu\text{M}$ , 20.0  $\mu\text{M}$ ) to the fresh medium for 24 hours in an incubator. Then, 10.0  $\mu\text{L}$  of MTT (5 mg/mL in PBS, pH 7.4)

was added to each well, and after the cells were incubated for another 2 hours, the culture supernatant was removed, and the resulting formazan crystals were dissolved in 150  $\mu$ L of dimethyl sulfoxide. Next, the plates were incubated for an additional 10 minutes at 37°C on a shaker at 60-70 rpm. Finally, the absorbance (A) of each well at 570 nm was measured using a microplate reader. (Cell relative viability =  $A_{\text{sample}} / A_{\text{control}} * 100\%$ ).

HeLa cells were plated in glass bottom dishes with fresh medium and incubated in a 37°C incubator for 24 hours. After washing with PBS buffer, fresh medium and 10.0  $\mu$ M probe were added and incubated for 30 min. After washing three times with PBS buffer, the medium and 40.0  $\mu$ M  $N_2H_4$  were added for treatment for 30 min. Finally, after washing three times with PBS buffer, the dishes were placed on a confocal laser scanning microscope for cell imaging.

## 2. Summary of AIE-based fluorescent probes for hydrazine.

**Table S1. The comparison of the reported AIE-based hydrazine fluorescent probes.**

| probes                                                                              | Solvent system (v/v)                      | LOD      | Response time | reference |
|-------------------------------------------------------------------------------------|-------------------------------------------|----------|---------------|-----------|
| 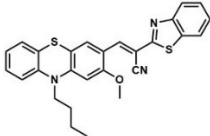   | DMSO/PBS (9/1)                            | 0.11 nM  | -             | 30        |
|    | DMSO/PBS (2/3)                            | 11 nM    | 60 min        | 31        |
|    | CH <sub>3</sub> CN/H <sub>2</sub> O (3/7) | 2.90 ppb | 45 min        | 32        |
|   | DMSO/PBS (6/4)                            | 0.04 μM  | 25 min        | 33        |
|  | THF/H <sub>2</sub> O (9:1)                | 0.119 nM | -             | 34        |
|  | DMSO/tris-HCl (3/1)                       | 0.196 μM | 20 min        | 35        |
|  | DMSO/PBS (9/1)                            | 2.88 ppb | 3 min         | 36        |
|  | DMSO/H <sub>2</sub> O (1/99)              | 1.2 ppb  | 2 min         | 37        |
|  | CH <sub>3</sub> CN/HEPES (3/97)           | 6.4 ppb  | -             | 38        |

|                                                                                   |                     |         |        |           |
|-----------------------------------------------------------------------------------|---------------------|---------|--------|-----------|
| 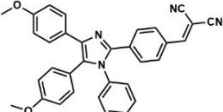 | DMSO/HEPES<br>(6/4) | 33.8 nM | 30 min | This work |
|-----------------------------------------------------------------------------------|---------------------|---------|--------|-----------|

### 3. Synthesis of the M-CHO and SWJT-31.

**Q-CHO** was synthesized according to previous work<sup>36</sup>. Aniline (93 mg, 1.0 mmol) and terephthalaldehyde (134 mg, 1.0 mmol) were dissolved in acetic acid (15 mL) and reacted at room temperature. After 1 h, p-Anisil (270 mg, 1.0 mmol) and ammonium acetate (539 mg, 7.0 mmol) were added to the reaction flask to react at 120 °C for 10 h to obtain **Q-CHO**.

The synthetic procedures of **SWJT-31** were shown in Scheme 2. **Q-CHO** (92 mg, 0.2 mmol) and malononitrile (12.6  $\mu$ L, 0.2 mmol) were dissolved in anhydrous ethanol (2.0 mL), followed by piperidine (8.0  $\mu$ L). Next, the mixture was stirred at room temperature overnight, and the orange yellow precipitate was precipitated and then filtered. After precipitation and purification, the orange yellow powder **SWJT-31** (71 mg) was obtained with a yield of 69.8%. <sup>1</sup>H NMR (600 MHz, CDCl<sub>3</sub>):  $\delta$  = 7.76 (d, *J* = 8.6 Hz, 2H), 7.66 (s, 1H), 7.59 (d, *J* = 8.6 Hz, 2H), 7.53 (d, *J* = 8.4 Hz, 2H), 7.39–7.33 (m, 3H), 7.10–7.03 (m, 4H), 6.83–6.76 (m, 4H), 3.79(s, 3H), 3.77 (s, 3H) ppm. <sup>13</sup>C NMR (100 MHz, CDCl<sub>3</sub>):  $\delta$  = 159.5, 158.8, 158.7, 144.1, 139.2, 136.9, 136.4, 132.3(2C), 131.8, 130.7(2C), 129.9, 129.5(2C), 129.0, 128.9(2C), 128.4(2C), 128.3(2C), 126.7, 122.1, 114.0(2C), 113.9, 113.7(2C), 112.7, 81.9, 55.2, 55.1 ppm. LC-MS: *m/z* 475.2 [M + H]<sup>+</sup>.

#### 4. $^1\text{H}$ , $^{13}\text{C}$ NMR spectra and LC-MS of SWJT-31.

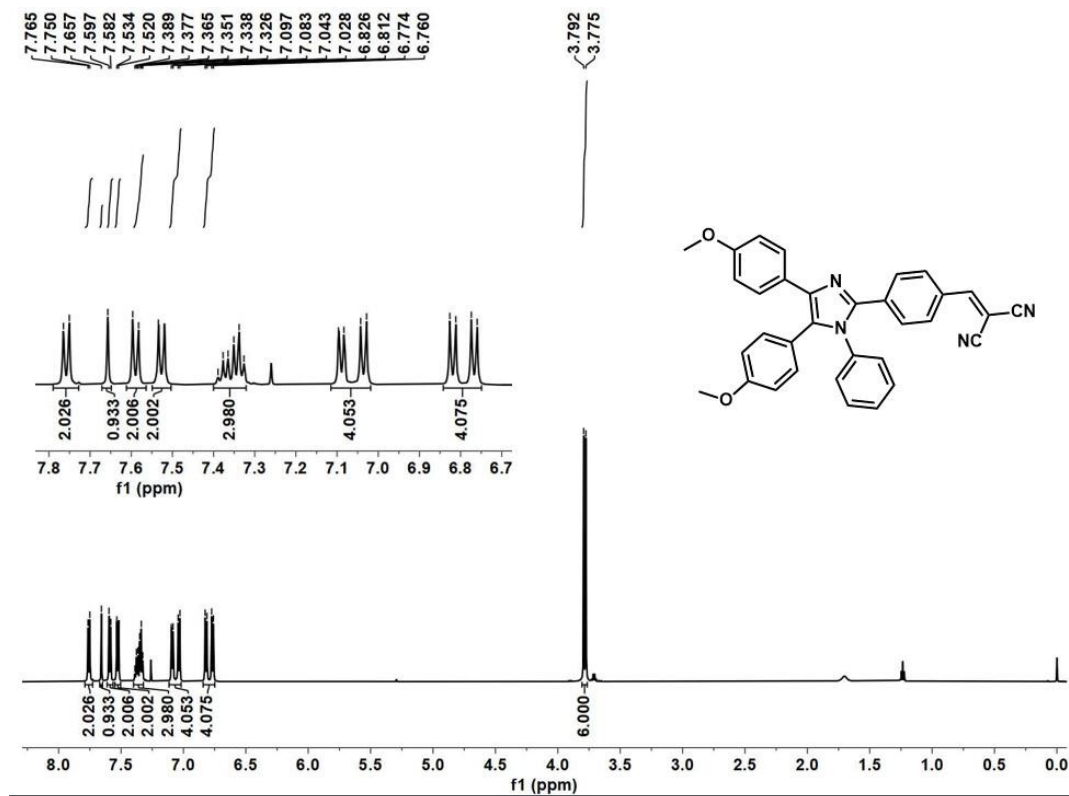

Figure S1.  $^1\text{H}$  NMR spectrum of SWJT-31 in  $\text{CDCl}_3$ .

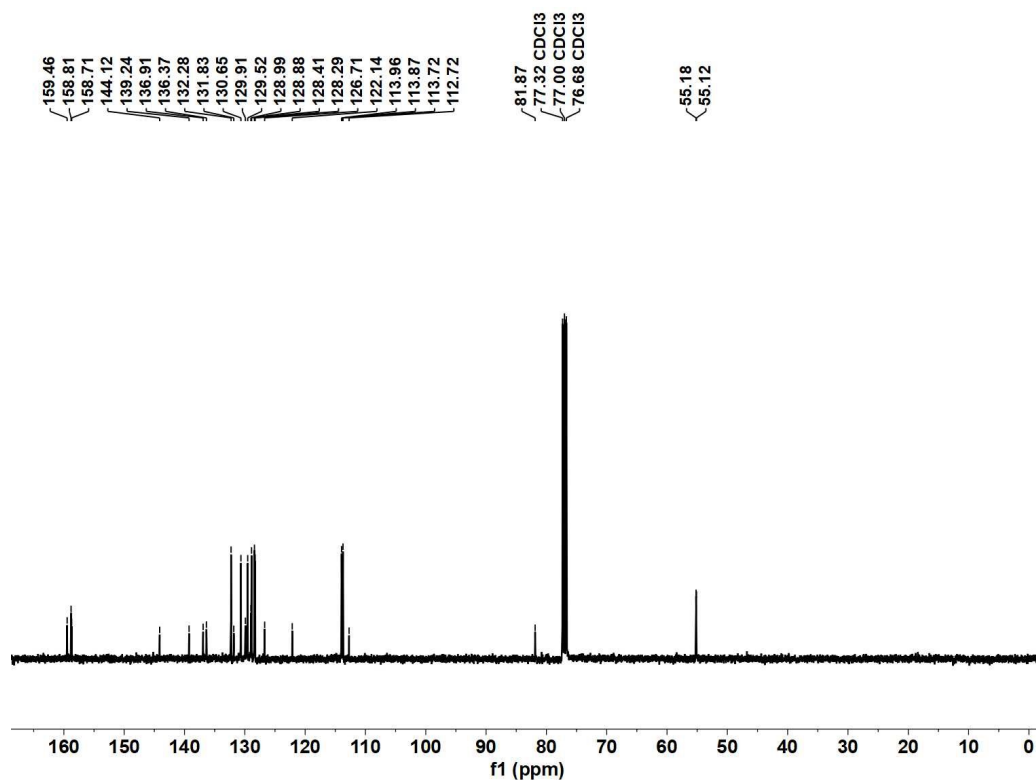

Figure S2.  $^{13}\text{C}$  NMR spectrum of SWJT-31 in  $\text{CDCl}_3$ .

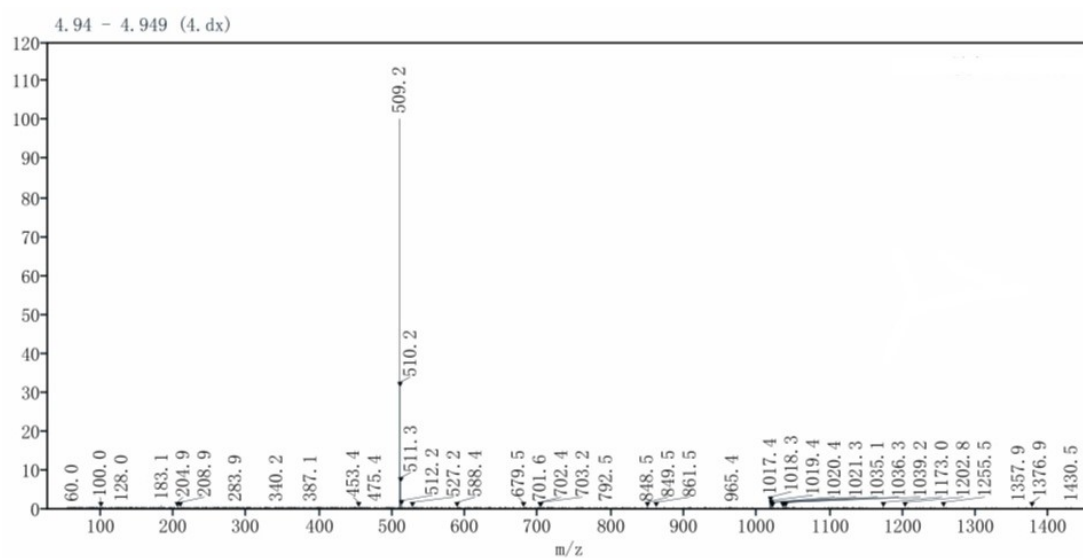

**Figure S3.** LC-MS spectrum of SWJT-31.



## 5. Basic properties of SWJT-31.

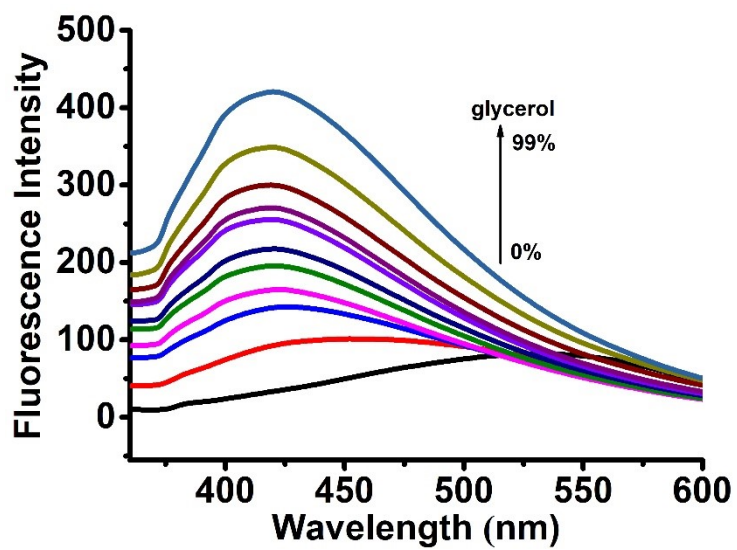

**Figure S4.** Fluorescence spectra of SWJT-31 (10.0 μM) in the presence of different viscosity in glycerol/ DMSO fraction.

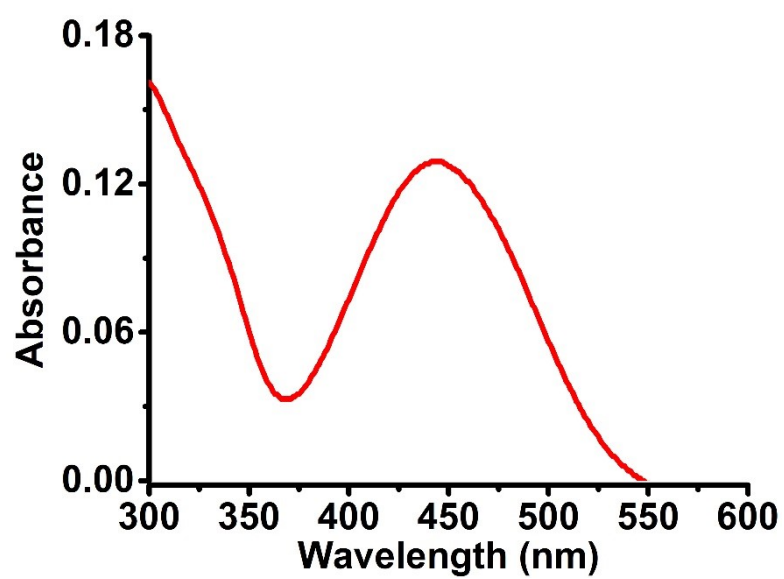

**Figure S5.** In DMSO/HEPES (v/v=1:99, pH = 7.4) buffer solution, absorption spectra of SWJT-31 (10.0  $\mu$ M).

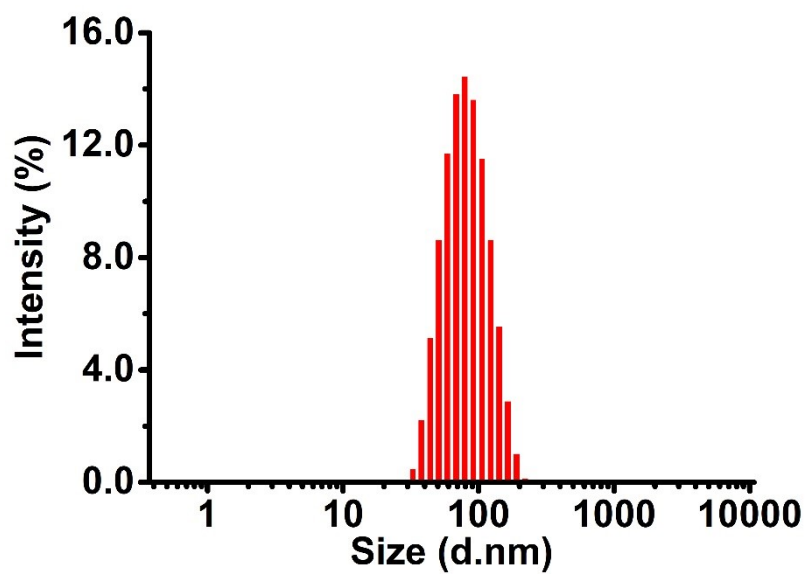

**Figure S6.** Size distribution of SWJT-31 in the aggregated state in 99% HEPES buffer solution (pH = 7.4).

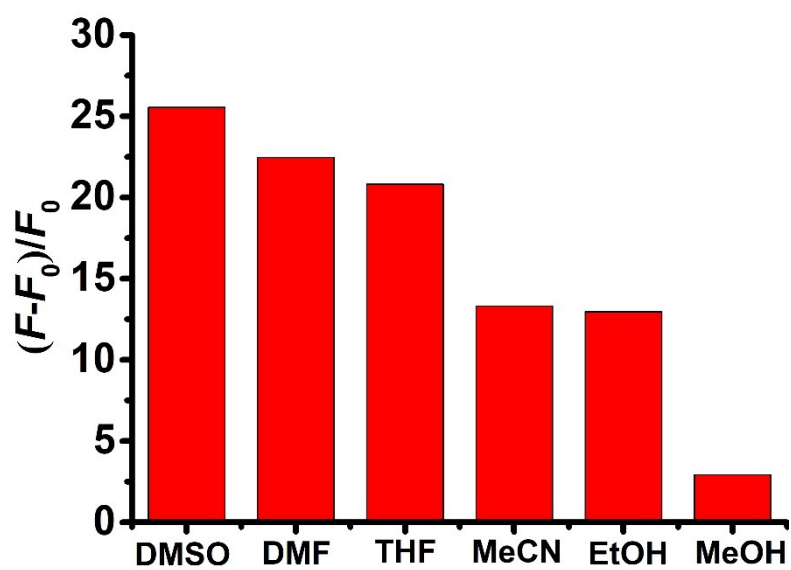

**Figure S7.** The fluorescence enhancement times of SWJT-31 (10.0  $\mu\text{M}$ ) and SWJT-31+  $\text{N}_2\text{H}_4$  (100.0  $\mu\text{M}$ ) in different organic phases at 497nm ( $\lambda_{\text{ex}} = 340$  nm).

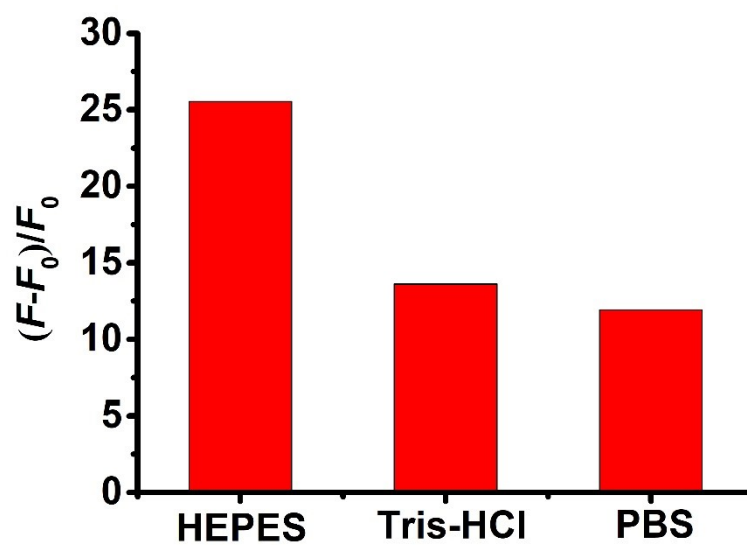

**Figure S8.** The fluorescence enhancement times of SWJT-31 (10.0  $\mu\text{M}$ ) and SWJT-31 +  $\text{N}_2\text{H}_4$  (100.0  $\mu\text{M}$ ) in different organic phases at 497nm ( $\lambda_{\text{ex}} = 340 \text{ nm}$ ).

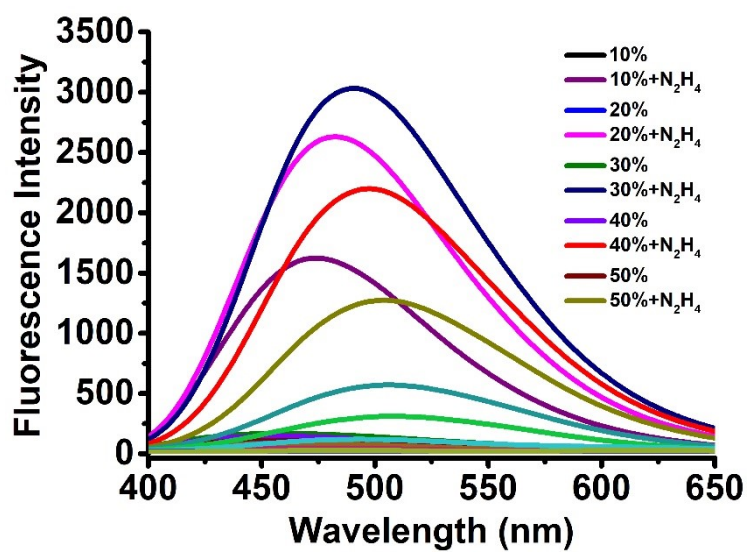

**Figure S9.** Fluorescence spectra versus the content of the DMSO/HEPES mixture of SWJT-31 in the presence of N<sub>2</sub>H<sub>4</sub>(100.0 μM) ( $\lambda_{\text{ex}} = 340 \text{ nm}$ ).

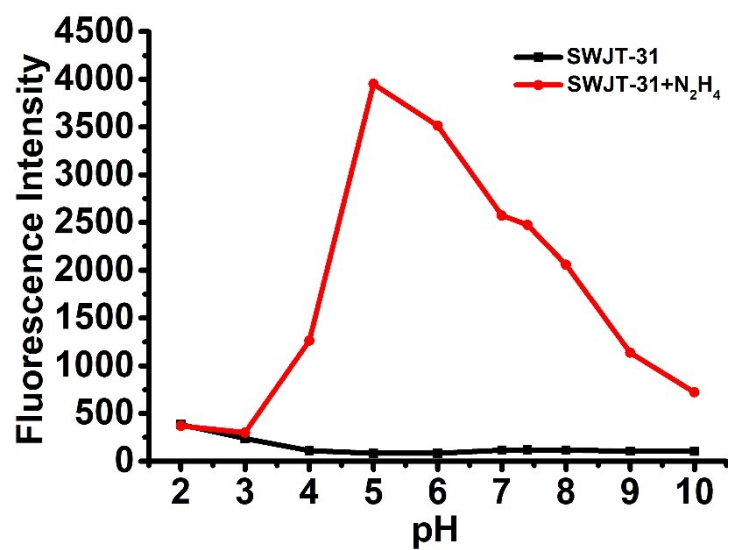

**Figure S10.** Effects of pH on the reaction of SWJT-31 (10.0  $\mu\text{M}$ ) with  $\text{N}_2\text{H}_4$  (100.0  $\mu\text{M}$ ) ( $\lambda_{\text{ex}} = 340 \text{ nm}$ ).

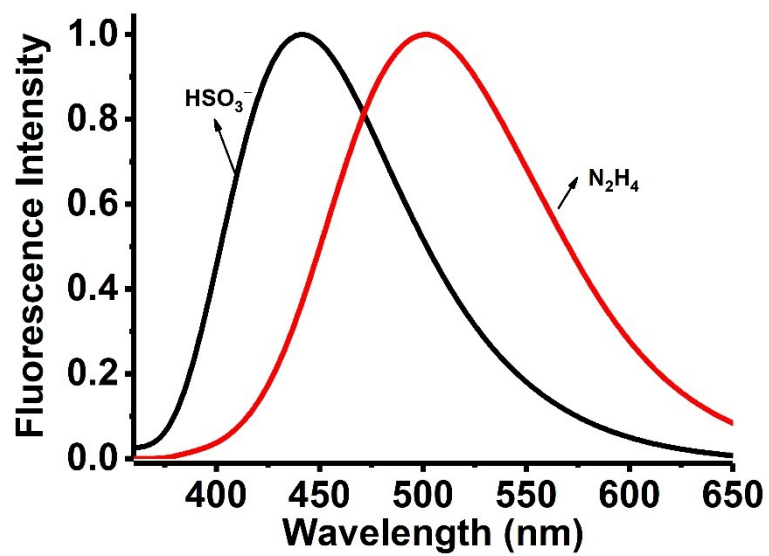

Figure S11. Fluorescence spectra of SWJT-31+  $\text{N}_2\text{H}_4$  and SWJT-31+  $\text{SO}_3^{2-}$ .



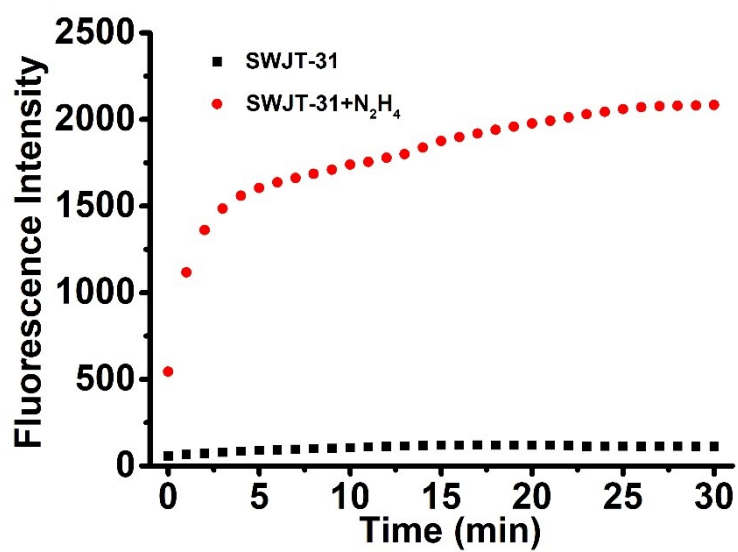

**Figure S12.** In the absence or presence of N<sub>2</sub>H<sub>4</sub> (10.0 μM), time-dependent fluorescence intensity of SWJT-31 (10.0 μM) in DMSO: HEPES (6:4, v/v, pH = 7.4) buffer solution at 497 nm ( $\lambda_{\text{ex}} = 340$  nm).

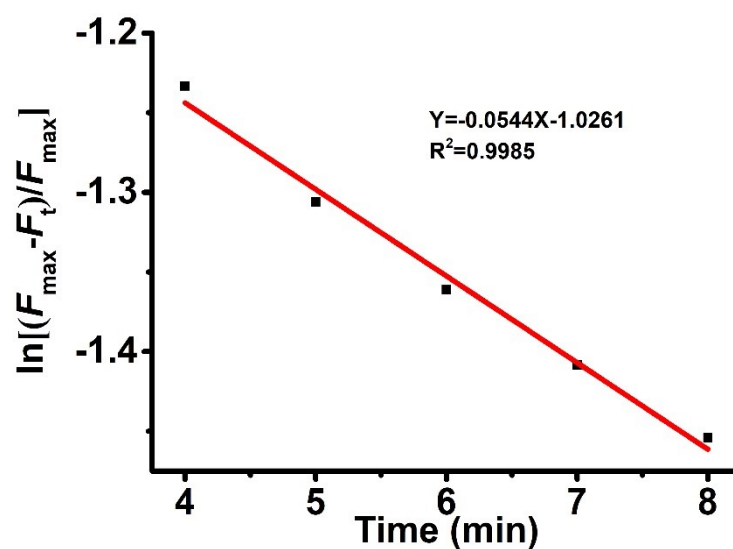

**Figure S13.** Pseudo first-order kinetic plots of SWJT-31 (10.0  $\mu\text{M}$ ) with the addition of  $\text{N}_2\text{H}_4$  in HEPES buffer solution (60% DMSO, pH = 7.4) ( $\lambda_{\text{ex}} = 340 \text{ nm}$ ).

The result of the analysis as follows:

$$\ln [(F_{\max} - F_t) / (F_{\max})] = -k_{\text{obs}}t$$

$$t_{1/2} = \ln 2 / k_{\text{obs}}$$

Where  $F_{\max}$  and  $F_t$  are the fluorescent intensity at maximum emission wavelength, and time  $t$ .  $k_{\text{obs}}$  is the pseudo-first-order rate constant.

$$k_{\text{obs}} = 9.06 \times 10^{-4} \text{ s}^{-1}$$

$$t_{1/2} = 12.74 \text{ min}$$

**6. Application of SWJT-31 as test strips.**

**Table S2. Determination of N<sub>2</sub>H<sub>4</sub> in water samples.**

| <b>Sample</b>       | <b>spiked(μM)</b> | <b>Found mean ± SD<sup>a</sup>(μM)</b> | <b>Recovery</b> |
|---------------------|-------------------|----------------------------------------|-----------------|
| <b>Tape water</b>   | 0                 | Not Detected                           |                 |
|                     | 2                 | 1.854±0.027                            | 92.69%          |
|                     | 6                 | 5.669±0.115                            | 94.49%          |
|                     | 10                | 10.736±0.029                           | 107.4%          |
| <b>Spring water</b> | 0                 | Not Detected                           |                 |
|                     | 2                 | 1.916±0.012                            | 95.81%          |
|                     | 6                 | 6.259±0.027                            | 104.3%          |
|                     | 10                | 10.17±0.239                            | 101.7%          |
| <b>Jing Lake</b>    | 0                 | Not Detected                           |                 |
|                     | 2                 | 1.887±0.043                            | 94.37%          |
|                     | 6                 | 5.214±0.106                            | 86.90%          |
|                     | 10                | 9.724±0.106                            | 97.24%          |

7.  $^1\text{H}$ ,  $^{13}\text{C}$  NMR spectra and LC-MS of the product SWJT-N2.

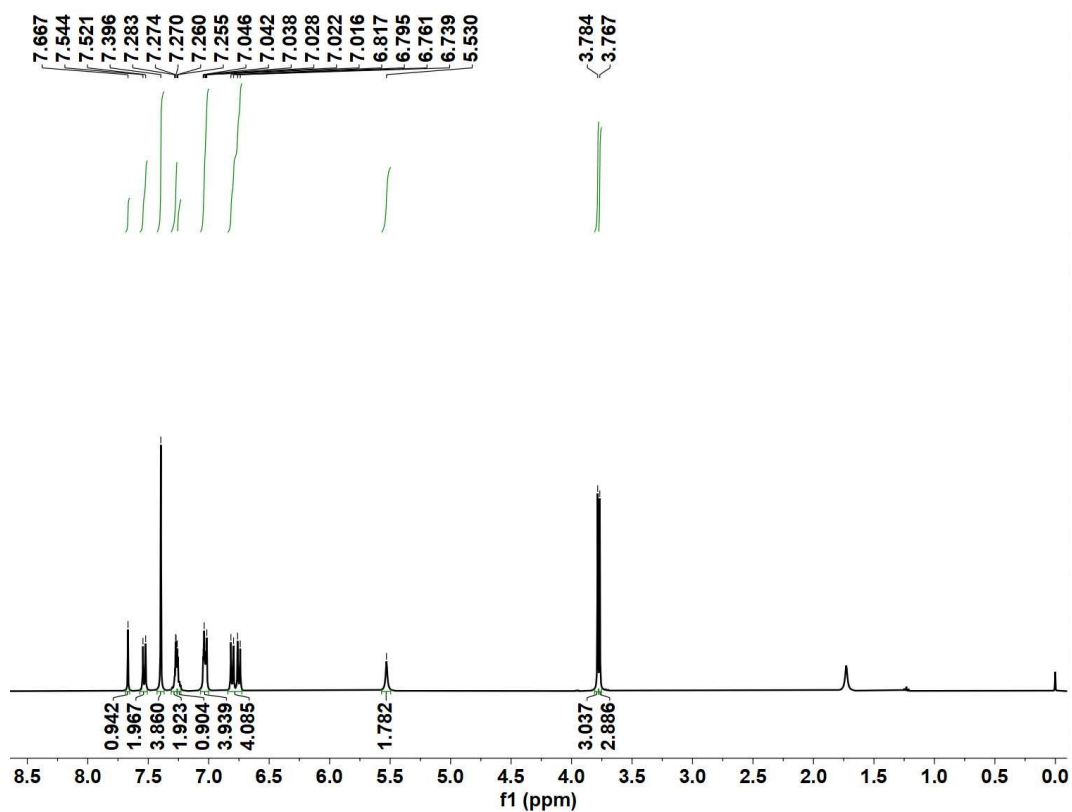

Figure S14.  $^1\text{H}$  NMR spectrum of the product SWJT-N2 in  $\text{CDCl}_3$ .

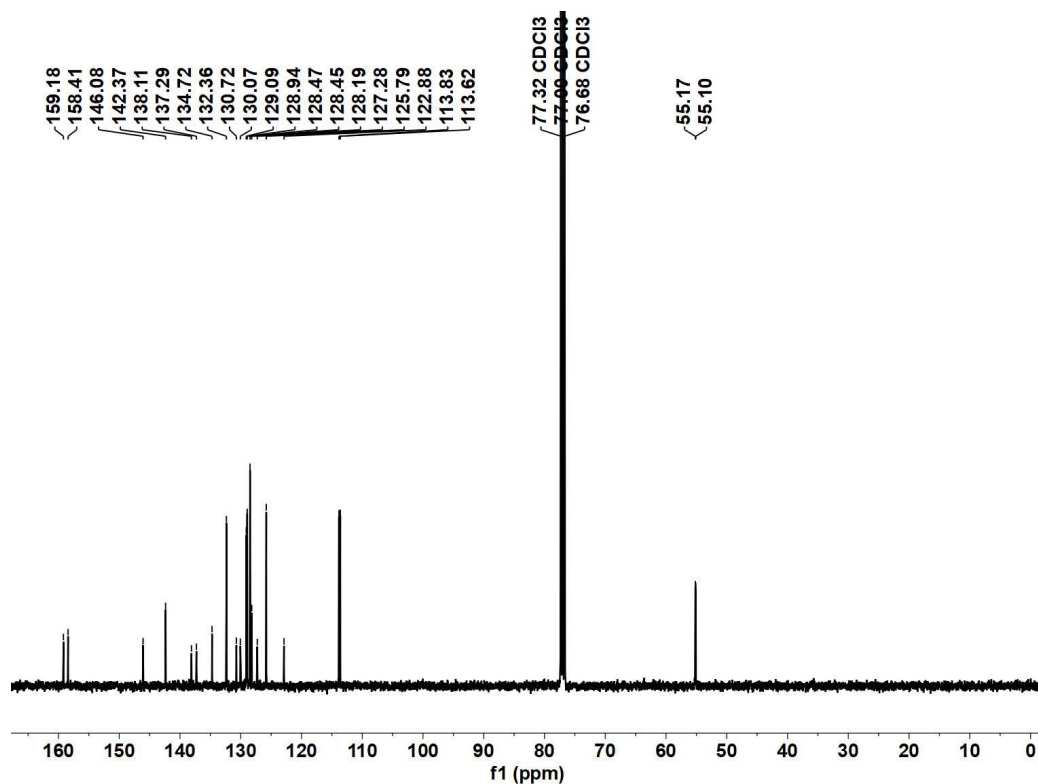

Figure S15.  $^{13}\text{C}$  NMR spectrum of the product SWJT-N2 in  $\text{CDCl}_3$ .

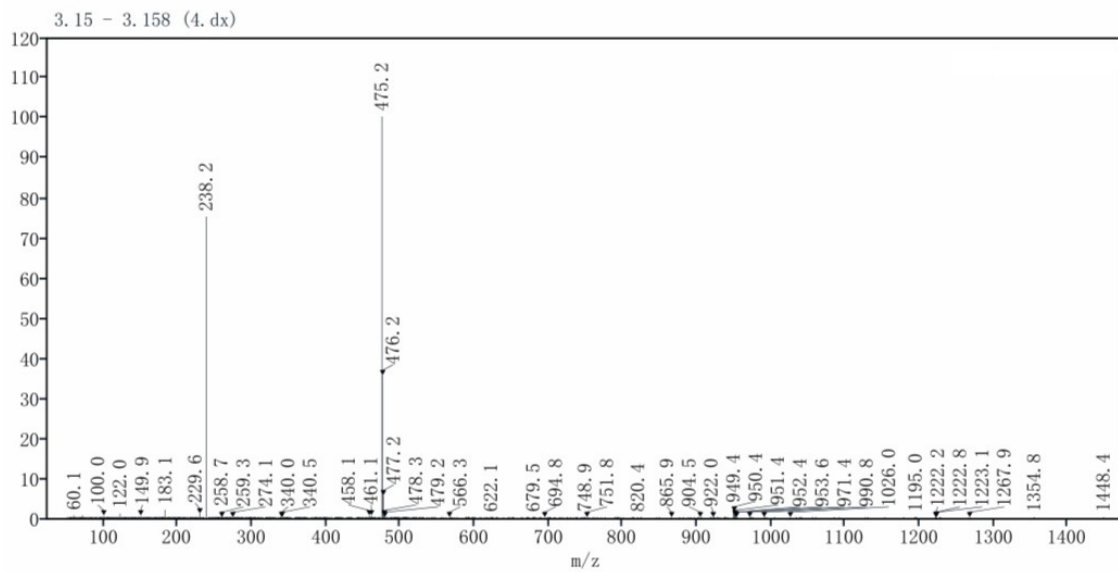

**Figure S16.** LC-MS spectrum of the product SWJT-N2.

## 8. Cytotoxicity of SWJT-31 in living HeLa cells.

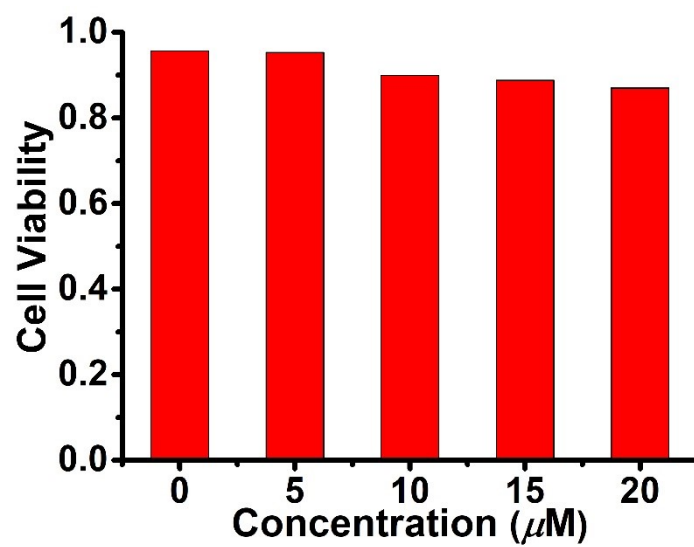

**Figure S17.** The viability of HeLa cells was determined by MTT assay after incubation with different concentrations of SWJT-31 for 24 h.
